# Supplementary material
Source: PubMed Central journal article supplement (PMC7370610)
Supplement: Supplemental_Material9.pdf [file Supplemental_Material9.pdf]

# Supplementary materials

## Supplementary figure 1

## Supplementary tables 1-5

## Supplementary methods 1-6

**Journal name:**

Journal of Cerebral Blood Flow & Metabolism

**Title:**

Oxidative stress-induced activation of Abl and Src kinases rapidly induces P-glycoprotein internalization via phosphorylation of caveolin-1 on tyrosine-14, decreasing cortisol efflux at the blood-brain barrier

**Author information:**

Yutaro Hoshi,<sup>\*¶</sup> Yasuo Uchida,<sup>\*¶</sup> Masanori Tachikawa,<sup>\*</sup> Sumio Ohtsuki,<sup>†</sup> Pierre-Olivier Couraud,<sup>‡</sup> Takashi Suzuki<sup>§</sup> and Tetsuya Terasaki<sup>\*</sup>

\*Graduate School of Pharmaceutical Sciences, Tohoku University, Sendai, Japan

†Faculty of Life Sciences, Kumamoto University, Kumamoto, Japan

‡Institut Cochin, Inserm U1016, CNRS UMR8104, Paris Descartes University, Sorbonne Paris City, Paris, France

§Department of Pathology and Histotechnology, Tohoku University Graduate School of Medicine, Japan

¶These two authors contributed equally to this work

**Corresponding author:**

Professor Tetsuya Terasaki, Ph.D.

Division of Membrane Transport and Drug Targeting, Graduate School of Pharmaceutical Sciences, Tohoku University, 6-3 Aoba, Aramaki, Aoba-ku, Sendai, 980-8578, JAPAN.

Voice: +81-22-795-6831; FAX: +81-22-795-6886;

E-mail: tetsuya.terasaki.d5@tohoku.ac.jp

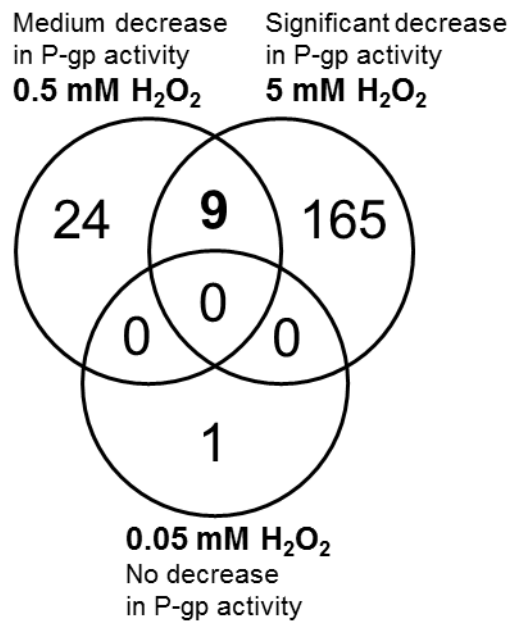

### Supplementary figure 1

Peptides with altered phosphorylation level in H<sub>2</sub>O<sub>2</sub>-treated hCMEC/D3 cells. hCMEC/D3 cells were treated with 0.05 mM, 0.5 mM or 5 mM H<sub>2</sub>O<sub>2</sub> for 20 min. The whole-cell lysate of hCMEC/D3 was digested with lysyl endopeptidase and trypsin. The phosphorylated peptides were enriched with the HAMMOC method and then dephosphorylated with hydrofluoric acid as described in Materials and Methods. The dephosphorylated peptides were subjected to nanoLC-MS/MS. Among the detected peptides, the peptides which showed over 3-fold difference between control and H<sub>2</sub>O<sub>2</sub> treated cells with statistically significance ( $p < 0.01$ ) were selected as peptides with altered phosphorylation level. Since P-gp efflux activity was decreased by both 0.5 mM and 5 mM H<sub>2</sub>O<sub>2</sub> treatment (Figure 1(b)), we finally selected the commonly identified peptides from the 0.5 mM and 5 mM H<sub>2</sub>O<sub>2</sub>-treated cells (Supplementary table 1).

**Supplementary table 1 The nine phosphoproteins showing significant changes in their phosphorylation levels in hCMEC/D3 cells treated with 0.5 mM and 5 mM H<sub>2</sub>O<sub>2</sub>**

| Description                                 | Peptide sequence                              | H <sub>2</sub> O <sub>2</sub> Conc. | Average peak intensity (cps)  |         | Peak intensity ratio (H <sub>2</sub> O <sub>2</sub> /control) | Students <i>t</i> -test p-value |
|---------------------------------------------|-----------------------------------------------|-------------------------------------|-------------------------------|---------|---------------------------------------------------------------|---------------------------------|
|                                             |                                               |                                     | H <sub>2</sub> O <sub>2</sub> | Control |                                                               |                                 |
| Caveolin-1                                  | <u>Y</u> VDS <u>E</u> GHL <u>Y</u> TVPIR      | 0.5 mM                              | 6221                          | 319     | 19.5                                                          | 6.28E-06                        |
|                                             |                                               | 5 mM                                | 16817                         | 878     | 19.2                                                          | 2.43E-05                        |
| Stromal interaction molecule 1              | AEQ <u>S</u> LHDLQER                          | 0.5 mM                              | 5901                          | 582     | 10.1                                                          | 6.29E-05                        |
|                                             |                                               | 5 mM                                | 13395                         | 402     | 33.3                                                          | 2.69E-06                        |
| Nuclear mitotic apparatus protein 1         | <u>A</u> T <u>S</u> S <u>T</u> Q <u>S</u> LAR | 0.5 mM                              | 7993                          | 1708    | 4.68                                                          | 7.70E-05                        |
|                                             |                                               | 5 mM                                | 15812                         | 2260    | 7.00                                                          | 2.05E-03                        |
| DENN domain-containing protein 4C           | VP <u>S</u> GIFDV <u>N</u> SR                 | 0.5 mM                              | 2151                          | 523     | 4.11                                                          | 6.01E-04                        |
|                                             |                                               | 5 mM                                | 4721                          | 535     | 8.83                                                          | 9.61E-06                        |
| Microtubule-associated protein 4            | LA <u>T</u> NT <u>S</u> APDLK                 | 0.5 mM                              | 14773                         | 2730    | 5.41                                                          | 1.36E-03                        |
|                                             |                                               | 5 mM                                | 12494                         | 3054    | 4.09                                                          | 1.92E-04                        |
| Platelet endothelial cell adhesion molecule | D <u>T</u> ET <u>V</u> Y <u>S</u> EV <u>R</u> | 0.5 mM                              | 3312                          | 849     | 3.9                                                           | 9.57E-03                        |
|                                             |                                               | 5 mM                                | 33236                         | 1545    | 21.5                                                          | 1.01E-06                        |
| Myelin protein zero-like protein 1          | <u>S</u> ES <u>V</u> V <u>Y</u> ADIR          | 0.5 mM                              | 6495                          | 1878    | 3.46                                                          | 1.22E-04                        |
|                                             |                                               | 5 mM                                | 15034                         | 3492    | 4.31                                                          | 2.94E-06                        |
| Heat shock protein beta-1                   | QL <u>S</u> SGV <u>S</u> EIR                  | 0.5 mM                              | 51592                         | 15842   | 3.26                                                          | 2.12E-04                        |
|                                             |                                               | 5 mM                                | 129024                        | 21109   | 6.11                                                          | 7.66E-07                        |
| Proto-oncogene tyrosine-protein kinase Src  | LIEDNE <u>Y</u> TAR                           | 0.5 mM                              | 513                           | 3022    | 0.17                                                          | 5.60E-05                        |
|                                             |                                               | 5 mM                                | 15848                         | 5172    | 3.06                                                          | 1.49E-02                        |

hCMEC/D3 cells were treated with 0.5 mM or 5 mM H<sub>2</sub>O<sub>2</sub> or vehicle (Control) for 20 min, and then whole-cell lysate (1800 μg protein) was digested with lysyl endopeptidase and trypsin. The phosphorylated peptides were enriched by the HAMMOC method. To increase the sensitivity of LC-MS/MS detection, the phosphorylated peptides were dephosphorylated by incubation with hydrofluoric acid. Finally, the dephosphorylated peptides were measured by nanoLC-MS/MS in the shotgun mode (information-dependent acquisition mode) in triplicate experiments. The peak intensities of the precursor ions of the dephosphorylated peptides were comprehensively compared between 0.5 mM or 5 mM H<sub>2</sub>O<sub>2</sub>- and vehicle-treated conditions using 2D-ICAL software. Among the identified peptides, the peptides that showed over 3-fold difference between control and H<sub>2</sub>O<sub>2</sub>-treated cells with statistical significance ( $p < 0.01$ ) were selected and are listed in Supplementary table 2 (0.5 mM H<sub>2</sub>O<sub>2</sub> treatment) and Supplementary table 3 (5 mM H<sub>2</sub>O<sub>2</sub> treatment). In this experiment, it is assumed that the difference in the detected peak intensities of dephosphorylated peptides is consistent with the difference in the phosphorylation levels in the peptides between the two conditions before the dephosphorylation step with hydrofluoric acid (possible phosphorylation sites are indicated with underlines). Among the proteins listed in Supplementary tables 2 and 3, we selected the nine listed in this table as candidate proteins potentially involved in regulating P-gp efflux transport activity, because these proteins were commonly identified in both 0.5 mM H<sub>2</sub>O<sub>2</sub> and 5 mM H<sub>2</sub>O<sub>2</sub>-treated cells.

**Supplementary table 2 (0.5 mM) List of peptides phosphorylated by 0.5 mM H<sub>2</sub>O<sub>2</sub> incubation for 20 min in hCMEC/D3 cells**

| Description                                       | Peptide sequence                                                         | Average peak intensity (cps)         |         | Peak intensity ratio (H <sub>2</sub> O <sub>2</sub> /control) | Student's <i>t</i> -test p-value |
|---------------------------------------------------|--------------------------------------------------------------------------|--------------------------------------|---------|---------------------------------------------------------------|----------------------------------|
|                                                   |                                                                          | 0.5 mM H <sub>2</sub> O <sub>2</sub> | Control |                                                               |                                  |
| Caveolin-1                                        | <u>Y</u> VDS <u>E</u> GHL <u>Y</u> TVPIR                                 | 6221                                 | 319     | 19.5                                                          | 6.28E-06                         |
| Stromal interaction molecule 1                    | AEQ <u>S</u> LHDLQER                                                     | 5901                                 | 582     | 10.13                                                         | 6.29E-05                         |
| Protein LYRIC                                     | L <u>S</u> SQ <u>S</u> AGEEK                                             | 4466                                 | 787     | 5.67                                                          | 1.39E-04                         |
| Myosin-9                                          | NLP <u>Y</u> <u>S</u> EEIV <u>Y</u> MYK (12M:Oxidation)                  | 1324                                 | 260     | 5.09                                                          | 1.96E-05                         |
|                                                   | <u>S</u> ME <u>A</u> EMIQLQEELAA <u>A</u> ER (2M:Oxidation 6M:Oxidation) | 828                                  | 188     | 4.40                                                          | 7.27E-05                         |
|                                                   | LQVELDNV <u>T</u> GLL <u>S</u> QSD <u>S</u> K                            | 1061                                 | 284     | 3.73                                                          | 1.03E-03                         |
| Transgelin-2                                      | N <u>F</u> S <u>D</u> NQLQEGK                                            | 2106                                 | 419     | 5.03                                                          | 3.48E-04                         |
| Nuclear mitotic apparatus protein 1               | A <u>T</u> <u>S</u> <u>S</u> <u>T</u> IQSLAR                             | 7993                                 | 1708    | 4.68                                                          | 7.70E-05                         |
| Myelin protein zero-like protein 1                | <u>S</u> PS <u>D</u> <u>T</u> IEGLVK                                     | 3846                                 | 886     | 4.34                                                          | 2.83E-03                         |
|                                                   | <u>S</u> <u>E</u> <u>S</u> <u>V</u> <u>V</u> <u>Y</u> ADIR               | 6495                                 | 1878    | 3.46                                                          | 1.22E-04                         |
| Calnexin                                          | APVPT <u>G</u> EVY <u>F</u> AD <u>S</u> FDR                              | 1637                                 | 383     | 4.28                                                          | 2.85E-03                         |
| DENN domain-containing protein 4C                 | V <u>P</u> <u>S</u> GIFDV <u>N</u> <u>S</u> R                            | 2151                                 | 523     | 4.11                                                          | 6.01E-04                         |
| Microtubule-associated protein 4                  | L <u>A</u> <u>T</u> <u>N</u> <u>T</u> <u>S</u> APDLK                     | 12494                                | 3054    | 4.09                                                          | 1.92E-04                         |
| Platelet endothelial cell adhesion molecule       | D <u>T</u> <u>E</u> <u>T</u> <u>V</u> <u>Y</u> <u>S</u> EV <u>R</u>      | 3312                                 | 849     | 3.90                                                          | 9.57E-03                         |
| Peptidyl-prolyl cis-trans isomerase A             | V <u>S</u> FELFADK                                                       | 3128                                 | 818     | 3.83                                                          | 5.06E-05                         |
| Histone H4                                        | <u>T</u> <u>V</u> <u>T</u> AMDV <u>V</u> <u>Y</u> ALK (5M:Oxidation)     | 4163                                 | 1125    | 3.70                                                          | 3.73E-03                         |
| Proteasome subunit alpha type-4                   | LLDEV <u>F</u> <u>F</u> SEK                                              | 640                                  | 193     | 3.31                                                          | 1.18E-03                         |
| Heat shock protein beta-1                         | QL <u>S</u> <u>S</u> GV <u>S</u> EIR                                     | 51592                                | 15842   | 3.26                                                          | 2.12E-04                         |
| Exocyst complex component 1                       | L <u>T</u> <u>G</u> <u>S</u> <u>T</u> <u>S</u> SLNK                      | 1120                                 | 3417    | 0.330                                                         | 6.75E-05                         |
| Nucleolar and coiled-body phosphoprotein 1        | VAD <u>N</u> <u>S</u> <u>F</u> DAK                                       | 608                                  | 2053    | 0.300                                                         | 1.69E-04                         |
| Splicing factor 3B subunit 1                      | G <u>S</u> <u>E</u> <u>T</u> PGAT <u>P</u> GS <u>K</u>                   | 497                                  | 1767    | 0.280                                                         | 2.20E-04                         |
| Antigen KI-67                                     | LDLLGNL <u>P</u> <u>G</u> <u>S</u> K                                     | 357                                  | 1824    | 0.200                                                         | 1.81E-04                         |
| Tyrosine-protein kinase Src                       | LIEDNE <u>Y</u> TAR                                                      | 513                                  | 3022    | 0.170                                                         | 5.60E-05                         |
| Arf-GAP domain and FG repeat-containing protein 1 | G <u>T</u> <u>P</u> <u>S</u> <u>Q</u> <u>S</u> PVVGR                     | 288                                  | 2290    | 0.130                                                         | 4.52E-05                         |

hCMEC/D3 cells were treated with 0.5 mM H<sub>2</sub>O<sub>2</sub> or vehicle (Control) for 20 min, and the whole-cell lysate (1800 µg protein) was digested with lysyl endopeptidase and trypsin. The phosphorylated peptides in the digests were enriched by the HAMMOC method. To increase the sensitivity of LC-MS/MS detection, the phosphorylated peptides were dephosphorylated by incubation with hydrofluoric acid. Finally, dephosphorylated peptides were measured by nanoLC-MS/MS in the shotgun mode (information-dependent acquisition mode) in triplicate experiments. The peak intensities of the precursor ions of the dephosphorylated peptides were comprehensively compared between 0.5 mM H<sub>2</sub>O<sub>2</sub>- and vehicle-treated conditions using 2D-ICAL software. Among the identified proteins, we focused only on peptides including either S, T or Y in this experiment, because serine (S), threonine (T) and tyrosine (Y) are generally considered potentially phosphorylatable. The average values of peak intensities from the three different measurements were calculated and used to calculate the ratio in the H<sub>2</sub>O<sub>2</sub> and control groups. The identified proteins whose peptide(s) exhibited more than 3-fold differences with statistical significance ( $p < 0.01$ , Student's *t*-test) between the two groups were finally selected and are listed here (24 peptides; 21 proteins). In this experiment, it is assumed that the difference in the peak intensities of dephosphorylated peptides detected is consistent with the difference in the phosphorylation levels in the peptides between the two conditions before the dephosphorylation step by hydrofluoric acid (possible phosphorylation sites are indicated with underlines).



**Supplementary table 3 (5 mM) List of peptides phosphorylated by 5 mM H<sub>2</sub>O<sub>2</sub> incubation for 20 min in hCMEC/D3 cells (continued from page 6 - 13)**

| Description                                                   | Peptide sequence                         | Average peak intensity (cps)       |         | Peak intensity ratio (H <sub>2</sub> O <sub>2</sub> /control) | Student's <i>t</i> -test p-value |
|---------------------------------------------------------------|------------------------------------------|------------------------------------|---------|---------------------------------------------------------------|----------------------------------|
|                                                               |                                          | 5 mM H <sub>2</sub> O <sub>2</sub> | Control |                                                               |                                  |
| Heterogeneous nuclear ribonucleoprotein D0                    | NEEDEGHSSPR                              | 53294                              | 403     | 132                                                           | 5.00E-08                         |
| Band 4.1-like protein 1                                       | HQASINELK                                | 16724                              | 359     | 46.6                                                          | 0.0013                           |
|                                                               | SDSDEGLLFSR                              | 3361                               | 10777   | 0.310                                                         | 1.20E-04                         |
| Lupus La protein                                              | FASSDDEHDEHDENGAIGPVK                    | 23696                              | 521     | 45.5                                                          | 0.0057                           |
| Secretory carrier-associated membrane protein 2               | AASSAAQGAQGN                             | 43232                              | 1012    | 42.7                                                          | 1.10E-05                         |
| A-kinase anchor protein 2                                     | QVLQSTQSPR                               | 12521                              | 300     | 41.7                                                          | 3.20E-05                         |
|                                                               | SPGALETPSAAGSQGNIASQGK                   | 3921                               | 480     | 8.17                                                          | 2.50E-07                         |
| Tyrosine-protein phosphatase non-receptor type 11             | VYENVGLMQQK (8M:Oxidation)               | 10273                              | 304     | 33.8                                                          | 2.10E-04                         |
| Stromal interaction molecule 1                                | AEQSLHDLQER                              | 13395                              | 402     | 33.3                                                          | 4.20E-04                         |
| Alpha-1B adrenergic receptor                                  | NFHEDTSSITK                              | 1567                               | 54      | 28.8                                                          | 0.029                            |
| Matrin-3                                                      | DTSENADGQSDENK                           | 10374                              | 387     | 26.8                                                          | 6.10E-07                         |
| Platelet endothelial cell adhesion molecule                   | DTETVYSEVR                               | 33236                              | 1545    | 21.5                                                          | 2.10E-04                         |
|                                                               | EPLNSDVQYTEVQVSSAESHK                    | 16016                              | 2725    | 5.88                                                          | 2.20E-07                         |
| HMG box transcription factor BBX                              | SPITPVNPR                                | 4043                               | 197     | 20.6                                                          | 1.40E-04                         |
| Mitochondrial import receptor subunit TOM70                   | ASPAPGSGHPEGPGAHLDMNSLDR (19M:Oxidation) | 16376                              | 806     | 20.3                                                          | 0.0026                           |
| Mitogen-activated protein kinase 1                            | VADPDHDHTGFLTEYVAIR                      | 31586                              | 1612    | 19.6                                                          | 8.90E-04                         |
| Caveolin-1                                                    | YVDSEGHLYTVPPIR                          | 16817                              | 878     | 19.2                                                          | 7.20E-05                         |
| Zinc finger CCCH domain-containing protein 13                 | STSPAGQHHSPISSR                          | 3017                               | 170     | 17.8                                                          | 0.005                            |
| Actin-binding LIM protein 1                                   | STSQGSINSPVYSR                           | 4853                               | 276     | 17.6                                                          | 1.50E-08                         |
| SHC-transforming protein 1                                    | ELFDDPSYVNVQNLDK                         | 8798                               | 536     | 16.4                                                          | 3.10E-07                         |
|                                                               | SSGHSSSELSPDAVEK                         | 7034                               | 500     | 14.1                                                          | 0.0026                           |
|                                                               | TPPVALNSSR                               | 9105                               | 890     | 10.2                                                          | 4.40E-04                         |
| Serine/arginine repetitive matrix protein 2                   | HASSSPESPAPAPGSHR                        | 3353                               | 14349   | 0.230                                                         | 0.043                            |
|                                                               | QGSITSPQANEQSVIPQR                       | 251                                | 2348    | 0.110                                                         | 2.00E-05                         |
| Proteasome subunit alpha type-3                               | EEDESDDDNM (10M:Oxidation)               | 3800                               | 273     | 13.9                                                          | 0.042                            |
| Cytospin-A                                                    | TPLSPSPMK (8M:Oxidation)                 | 7151                               | 547     | 13.1                                                          | 3.20E-04                         |
| Protein disulfide-isomerase                                   | DHENIVIAK                                | 2768                               | 229     | 12.1                                                          | 6.50E-04                         |
| Disintegrin and metalloproteinase domain-containing protein 9 | EVPIYANR                                 | 17391                              | 1467    | 11.9                                                          | 0.011                            |
|                                                               | AEAPLPSPK                                | 30410                              | 2613    | 11.6                                                          | 3.70E-05                         |
|                                                               | FGTFGGLGSK                               | 21914                              | 2580    | 8.50                                                          | 1.50E-05                         |
|                                                               | GEYDVTMPK (7M:Oxidation)                 | 2880                               | 464     | 6.20                                                          | 3.40E-04                         |
|                                                               | ISMPDIDLNLK (3M:Oxidation)               | 2983                               | 946     | 3.15                                                          | 0.026                            |
| Neuroblast differentiation-associated protein AHNAK           | GDLDAVPSMK (10M:Oxidation)               | 2084                               | 677     | 3.08                                                          | 0.039                            |
|                                                               | GGVIGSPEASISGSK                          | 1415                               | 41325   | 0.0300                                                        | 1.20E-05                         |
|                                                               | FK506-binding protein 15                 | RPQEQSASASSGQPQAPLNR               | 2666    | 232                                                           | 11.5                             |
| Microtubule-associated protein 1B                             | GAESPFEK                                 | 7029                               | 641     | 11.0                                                          | 0.002                            |
| 5--AMP-activated protein kinase subunit beta-1                | SHNNFVAILDLPEGEHQYK                      | 6495                               | 604     | 10.8                                                          | 0.0019                           |
| Tight junction protein ZO-2                                   | HPDIYAVPIK                               | 10941                              | 1048    | 10.4                                                          | 0.0019                           |
| E3 SUMO-protein ligase RanBP2                                 | SGSSFVHQASFK                             | 6101                               | 604     | 10.1                                                          | 0.023                            |
| Tensin-3                                                      | ASEAASPLPDSPGDK                          | 3499                               | 361     | 9.69                                                          | 1.70E-04                         |

**Supplementary table 3 (5 mM) List of peptides phosphorylated by 5 mM H<sub>2</sub>O<sub>2</sub> incubation for 20 min in hCMEC/D3 cells (continued from page 6 - 13)**

| Description                                                 | Peptide sequence                                                                              | Average peak intensity (cps)       |              | Peak intensity ratio (H <sub>2</sub> O <sub>2</sub> /control) | Student's <i>t</i> -test p-value |
|-------------------------------------------------------------|-----------------------------------------------------------------------------------------------|------------------------------------|--------------|---------------------------------------------------------------|----------------------------------|
|                                                             |                                                                                               | 5 mM H <sub>2</sub> O <sub>2</sub> | Control      |                                                               |                                  |
| G patch domain-containing protein 8                         | GPKPEPPG <u>S</u> GSPAPPR                                                                     | 8370                               | 926          | 9.04                                                          | 5.30E-05                         |
| DENN domain-containing protein 4C                           | VP <u>S</u> GIFDVN <u>S</u> R                                                                 | 4721                               | 535          | 8.83                                                          | 1.80E-04                         |
| Bromodomain adjacent to zinc finger domain protein 1A       | ELDQDMVTEDEDDPG <u>S</u> HK (6M:Oxidation)                                                    | 2855                               | 328          | 8.70                                                          | 3.80E-04                         |
| Platelet endothelial aggregation receptor 1                 | GLI <u>S</u> EEELGASVA <u>S</u> L <u>S</u> ENPYAT <u>I</u> R                                  | 3147                               | 362          | 8.69                                                          | 4.20E-09                         |
| Cyclin-dependent kinase 12                                  | <u>S</u> SSPFL <u>S</u> SK                                                                    | 4832                               | 559          | 8.65                                                          | 2.40E-04                         |
| Heterogeneous nuclear ribonucleoprotein U                   | <u>S</u> SGPT <u>S</u> LFVAVTVAPPGAR                                                          | 9518                               | 1161         | 8.20                                                          | 1.20E-04                         |
| Ankyrin repeat and KH domain-containing protein 1           | LNL <u>T</u> SPK                                                                              | 2991                               | 379          | 7.89                                                          | 3.10E-04                         |
| Tyrosine-protein phosphatase non-receptor type substrate 1  | EITQD <u>T</u> ND <u>I</u> TYADLNLPK<br>QPAPKPEP <u>S</u> FE <u>Y</u> ASVQVPR                 | 5061<br>4947                       | 642<br>808   | 7.88<br>6.13                                                  | 3.00E-04<br>0.027                |
| Tyrosine-protein kinase receptor UFO                        | <u>I</u> YNGD <u>Y</u> YR                                                                     | 5085                               | 671          | 7.57                                                          | 6.30E-04                         |
| Integrator complex subunit 3                                | NATQPPNAEE <u>S</u> GSSSA <u>S</u> EEED <u>T</u> KPKPTK                                       | 2767                               | 380          | 7.28                                                          | 0.0016                           |
| Structural maintenance of chromosomes protein 1A            | GT <u>M</u> DD <u>I</u> SQEEG <u>S</u> SQGED <u>S</u> V <u>S</u> G <u>S</u> QR (3M:Oxidation) | 1863                               | 259          | 7.19                                                          | 8.50E-06                         |
| Protein disulfide-isomerase A6                              | DGELPVEDDIDL <u>S</u> DVELDDLK                                                                | 2638                               | 369          | 7.14                                                          | 3.00E-09                         |
| Nuclear mitotic apparatus protein 1                         | AT <u>S</u> ST <u>I</u> QSLAR                                                                 | 15812                              | 2260         | 7.00                                                          | 2.50E-05                         |
| Condensin complex subunit 2                                 | GHPH <u>S</u> ASSP <u>S</u> FER                                                               | 2047                               | 320          | 6.40                                                          | 8.70E-04                         |
| Ribonucleoside-diphosphate reductase subunit M2             | VPLAP <u>I</u> TDPQQL <u>S</u> PLK                                                            | 7595                               | 1206         | 6.30                                                          | 3.10E-08                         |
| Protein LSM14 homolog A                                     | <u>T</u> QL <u>S</u> QGR                                                                      | 6036                               | 970          | 6.22                                                          | 0.0019                           |
| Heat shock protein beta-1                                   | QL <u>S</u> SGV <u>S</u> EIR                                                                  | 129024                             | 21109        | 6.11                                                          | 8.10E-06                         |
| Tuftelin-interacting protein 11                             | GAAEEAELED <u>S</u> DDEEKPVK                                                                  | 4342                               | 739          | 5.88                                                          | 4.50E-06                         |
| Vimentin                                                    | ISLPLPN <u>F</u> SSLNLR<br>LLEGEE <u>S</u> R                                                  | 12223<br>941                       | 2183<br>2976 | 5.60<br>0.320                                                 | 5.70E-07<br>0.0029               |
| Palladin                                                    | IASDEEIQ <u>G</u> TK<br>LA <u>I</u> NT <u>S</u> APDLK                                         | 10597<br>14773                     | 1947<br>2730 | 5.44<br>5.41                                                  | 1.30E-05<br>1.30E-06             |
| Microtubule-associated protein 4                            | DV <u>T</u> PPP <u>T</u> EVVLIK                                                               | 11210                              | 3091         | 3.63                                                          | 0.021                            |
| Brefeldin A-inhibited guanine nucleotide-exchange protein 2 | G <u>S</u> SL <u>S</u> G <u>T</u> DDGAQEVVK                                                   | 1989                               | 382          | 5.21                                                          | 9.10E-04                         |
| Phosphorylated CTD-interacting factor 1                     | IEIPV <u>T</u> P <u>T</u> GQ <u>S</u> VP <u>S</u> SP <u>S</u> IPG <u>T</u> PTLK               | 2420                               | 499          | 4.85                                                          | 4.00E-04                         |
| Epsin-1                                                     | <u>T</u> ALPT <u>S</u> GSSAGELELLAGEVPAR                                                      | 2041                               | 439          | 4.65                                                          | 6.10E-05                         |
| Src substrate cortactin                                     | <u>I</u> Q <u>T</u> PPV <u>S</u> PAPQ <u>T</u> EER                                            | 3425                               | 773          | 4.43                                                          | 2.70E-04                         |
| Protein enabled homolog                                     | QNSQLPAQVQNGPSQEELIQR                                                                         | 4683                               | 1075         | 4.36                                                          | 4.00E-07                         |
| Canalicular multispecific organic anion transporter 2       | QL <u>S</u> AL <u>S</u> SDGEGQGRPVPR                                                          | 4678                               | 1074         | 4.35                                                          | 1.30E-04                         |
| Negative elongation factor E                                | <u>S</u> ISADDDLQ <u>E</u> SSR<br><u>S</u> ESV <u>V</u> YADIR                                 | 8395<br>15034                      | 1943<br>3492 | 4.32<br>4.31                                                  | 5.50E-06<br>3.00E-05             |
| Myelin protein zero-like protein 1                          | <u>S</u> PSD <u>I</u> EGLVK                                                                   | 5510                               | 1471         | 3.75                                                          | 3.80E-05                         |
| Synaptosomal-associated protein 23                          | EDEMEEN <u>I</u> QVGS <u>I</u> LGNLK (4M:Oxidation)                                           | 808                                | 191          | 4.23                                                          | 0.002                            |
| Protein kinase C delta type                                 | NLID <u>S</u> MDQSAFAG <u>S</u> FFVNPK (6M:Oxidation)                                         | 4895                               | 1178         | 4.16                                                          | 1.40E-07                         |
| LIM domain only protein 7                                   | GE <u>S</u> LDNLD <u>S</u> PR                                                                 | 6246                               | 1545         | 4.04                                                          | 4.10E-06                         |
| Dystroglycan                                                | L <u>T</u> LEDQAT <u>F</u> IK                                                                 | 9896                               | 2487         | 3.98                                                          | 5.30E-04                         |
| Nucleoprotein TPR                                           | <u>T</u> DGFAEAIH <u>S</u> PPQVAGVPR                                                          | 15244                              | 3867         | 3.94                                                          | 5.00E-04                         |
| Serine/threonine-protein kinase D1                          | <u>S</u> VVG <u>T</u> PAYLAPEVLR                                                              | 4228                               | 1084         | 3.90                                                          | 1.10E-07                         |

**Supplementary table 3 (5 mM) List of peptides phosphorylated by 5 mM H<sub>2</sub>O<sub>2</sub> incubation for 20 min in hCMEC/D3 cells (continued from page 6 - 13)**

| Description                                           | Peptide sequence                                                                                 | Average peak intensity (cps)       |         | Peak intensity ratio (H <sub>2</sub> O <sub>2</sub> /control) | Student's <i>t</i> -test p-value |
|-------------------------------------------------------|--------------------------------------------------------------------------------------------------|------------------------------------|---------|---------------------------------------------------------------|----------------------------------|
|                                                       |                                                                                                  | 5 mM H <sub>2</sub> O <sub>2</sub> | Control |                                                               |                                  |
| Myosin-9                                              | EQADFAIEALAK                                                                                     | 6396                               | 1667    | 3.84                                                          | 6.30E-05                         |
| Splicing factor 3B subunit 1                          | <u>T</u> MII <u>S</u> PER (2M:Oxidation)                                                         | 11066                              | 2888    | 3.83                                                          | 0.0073                           |
| Protein LAP2                                          | <u>S</u> ATLL <u>Y</u> DQPLQVFTGSSSSDL <u>I</u> S<br>GTK                                         | 5682                               | 1483    | 3.83                                                          | 2.80E-11                         |
| E1A-binding protein p400                              | AL <u>S</u> PV <u>T</u> SR                                                                       | 2194                               | 572     | 3.83                                                          | 0.0039                           |
| MAGUK p55 subfamily member 5                          | V <u>Y</u> E <u>S</u> IGQ <u>Y</u> GG <u>E</u> IVK                                               | 2732                               | 719     | 3.80                                                          | 6.30E-04                         |
| Cyclin-L1                                             | GLNPDGTPAL <u>S</u> TLGGFSPAS <u>K</u> PS<br>SPR                                                 | 10747                              | 2888    | 3.72                                                          | 7.30E-08                         |
| Pseudopodium-enriched atypical kinase 1               | VPIVINPNAYDNLAI <u>Y</u> K                                                                       | 3340                               | 899     | 3.71                                                          | 8.50E-05                         |
| Actin-binding protein anillin                         | TQ <u>S</u> LPV <u>I</u> EK                                                                      | 4767                               | 1342    | 3.55                                                          | 0.017                            |
| Bcl-2-associated transcription factor 1               | AEGEPQ <u>E</u> SPLK                                                                             | 13575                              | 3872    | 3.51                                                          | 8.10E-07                         |
|                                                       | FND <u>S</u> EGDDT <u>E</u> E <u>T</u> ED <u>Y</u> R                                             | 470                                | 7523    | 0.0600                                                        | 3.50E-04                         |
| Alpha-actinin-1                                       | AIM <u>T</u> YV <u>S</u> SFYHAFSGAQK                                                             | 1269                               | 370     | 3.43                                                          | 0.002                            |
| Membrane-associated progesterone receptor component 2 | DF <u>S</u> LEQLR                                                                                | 4082                               | 1209    | 3.38                                                          | 0.046                            |
| DmX-like protein 1                                    | QEPV <u>I</u> DSY <u>S</u> GS <u>I</u> PS <u>I</u> SLIK                                          | 1092                               | 325     | 3.36                                                          | 0.0013                           |
| DNA repair protein complementing XP-G cells           | NAPAAVDEGS <u>I</u> SPR                                                                          | 3821                               | 1142    | 3.35                                                          | 2.10E-07                         |
| Nuclear pore complex protein Nup214                   | T <u>P</u> S <u>I</u> Q <u>P</u> SLLPHAAPFAK                                                     | 5427                               | 1633    | 3.32                                                          | 0.0012                           |
| Negative elongation factor B                          | K <u>P</u> S <u>P</u> AQAA <u>E</u> TPALELPL <u>S</u> VPAP<br>APL                                | 6432                               | 1941    | 3.31                                                          | 3.00E-05                         |
| Zinc finger CCCH-type antiviral protein 1             | <u>S</u> SLG <u>S</u> LQTP <u>E</u> AV <u>T</u> TR                                               | 1366                               | 429     | 3.18                                                          | 0.03                             |
| Transcription intermediary factor 1-beta              | LDL <u>D</u> L <u>I</u> AD <u>S</u> QPPVFK                                                       | 2963                               | 952     | 3.11                                                          | 0.0034                           |
| Tumor suppressor p53-binding protein 1                | FVPA <u>E</u> ND <u>S</u> ILMNPAQDGEVQ <u>L</u> S<br>QNDDK (11M:Oxidation)                       | 5380                               | 1746    | 3.08                                                          | 4.40E-06                         |
| Histone H4                                            | <u>T</u> VTAMDVV <u>Y</u> ALK<br>(5M:Oxidation)                                                  | 14175                              | 4634    | 3.06                                                          | 1.30E-07                         |
| Epidermal growth factor receptor substrate 15         | LNDPFQPFPGND <u>S</u> PK                                                                         | 4320                               | 1410    | 3.06                                                          | 0.0012                           |
| Proto-oncogene tyrosine-protein kinase Src            | LI <u>E</u> DNE <u>Y</u> TAR                                                                     | 5172                               | 15848   | 3.06                                                          | 7.60E-06                         |
| DNA topoisomerase 2-alpha                             | FTMDL <u>S</u> DEDF <u>S</u> DFDEK<br>(3M:Oxidation)                                             | 6532                               | 2149    | 3.04                                                          | 1.10E-09                         |
| H(+)/Cl(-) exchange transporter 7                     | VGHM <u>S</u> SVELDDELDPDMDPP<br>HPFPK (4M:Oxidation)<br>18M:Oxidation)                          | 5239                               | 1746    | 3.00                                                          | 6.60E-06                         |
| Transcription activator BRG1                          | A <u>E</u> NA <u>E</u> GQTPAIGPDGEPL <u>D</u> ETSQ<br>MSDLPVK (24M:Oxidation)                    | 1040                               | 3116    | 0.330                                                         | 3.30E-10                         |
| Cutaneous T-cell lymphoma-associated antigen 5        | AFL <u>S</u> PP <u>I</u> LL <u>E</u> G <u>P</u> LR                                               | 390                                | 1186    | 0.330                                                         | 7.60E-06                         |
| E3 UFM1-protein ligase 1                              | DDD <u>S</u> DDE <u>S</u> QSS <u>H</u> IGK                                                       | 19079                              | 63806   | 0.299                                                         | 2.40E-06                         |
| Multidrug resistance-associated protein 1             | HHN <u>S</u> T <u>A</u> ELQK                                                                     | 3565                               | 12381   | 0.290                                                         | 0.021                            |
| AT-rich interactive domain-containing protein 1A      | GP <u>S</u> PSVPVGS <u>P</u> AS <u>V</u> AQ <u>S</u> R                                           | 1481                               | 5105    | 0.290                                                         | 3.50E-04                         |
| Transcription factor AP-1                             | LA <u>S</u> PELER                                                                                | 1127                               | 3882    | 0.290                                                         | 4.60E-04                         |
| Actin, cytoplasmic 1                                  | DL <u>T</u> D <u>Y</u> LMK                                                                       | 1008                               | 3812    | 0.260                                                         | 0.014                            |
|                                                       | E <u>I</u> TALAP <u>S</u> TMK                                                                    | 517                                | 2638    | 0.200                                                         | 0.0028                           |
| Forkhead box protein K1                               | <u>S</u> APAS <u>P</u> TH <u>P</u> GLM <u>S</u> PR<br>(12M:Oxidation)                            | 2866                               | 11411   | 0.250                                                         | 7.90E-05                         |
| Coiled-coil domain-containing protein 6               | LDQP <u>V</u> S <u>A</u> PP <u>S</u> PR                                                          | 506                                | 2461    | 0.210                                                         | 6.10E-05                         |
| Ankyrin                                               | <u>S</u> IT <u>S</u> TI <u>P</u> L <u>S</u> GK                                                   | 2113                               | 11591   | 0.180                                                         | 0.0021                           |
| Myb-binding protein 1A                                | E <u>I</u> PS <u>A</u> T <u>Q</u> SP <u>I</u> SK                                                 | 1679                               | 9537    | 0.180                                                         | 0.034                            |
| A-kinase anchor protein 12                            | <u>S</u> ATLS <u>S</u> TEST <u>A</u> S <u>E</u> M <u>Q</u> EEMK<br>(14M:Oxidation 18M:Oxidation) | 613                                | 3377    | 0.180                                                         | 1.90E-04                         |



**Supplementary table 3 (5 mM) List of peptides phosphorylated by 5 mM H<sub>2</sub>O<sub>2</sub> incubation for 20 min in hCMEC/D3 cells (continued from page 6 - 13)**

| Description                                                                                   | Peptide sequence                                                                   | Average peak intensity (cps)       |         | Peak intensity ratio (H <sub>2</sub> O <sub>2</sub> /control) | Student's <i>t</i> -test p-value |
|-----------------------------------------------------------------------------------------------|------------------------------------------------------------------------------------|------------------------------------|---------|---------------------------------------------------------------|----------------------------------|
|                                                                                               |                                                                                    | 5 mM H <sub>2</sub> O <sub>2</sub> | Control |                                                               |                                  |
| Zinc finger CCCH domain-containing protein 18                                                 | A <u>S</u> DLEDEE <u>S</u> AAR                                                     | 599                                | 3740    | 0.160                                                         | 2.50E-04                         |
| A-kinase anchor protein 5                                                                     | <u>S</u> TQDL <u>S</u> EG <u>S</u> IR                                              | 355                                | 2195    | 0.160                                                         | 8.60E-06                         |
| U5 small nuclear ribonucleoprotein 200 kDa helicase                                           | EEA <u>S</u> DDDM <u>E</u> GDEAVVR (8M:Oxidation)                                  | 2006                               | 13658   | 0.150                                                         | 4.20E-12                         |
| Double-strand break repair protein MRE11A                                                     | NY <u>S</u> EVIEVDE <u>S</u> DVEEDIFPTTSK                                          | 280                                | 1904    | 0.150                                                         | 1.60E-09                         |
| Paralemmin-1                                                                                  | <u>T</u> EVVMN <u>S</u> QQ <u>T</u> PVG <u>T</u> PK (5M:Oxidation)                 | 873                                | 6209    | 0.140                                                         | 1.30E-04                         |
| RNA-binding protein 12B                                                                       | <u>S</u> P <u>T</u> EDFR                                                           | 628                                | 4472    | 0.140                                                         | 0.0019                           |
| Apoptosis-stimulating of p53 protein 2                                                        | NQ <u>S</u> SE <u>D</u> ILR                                                        | 500                                | 3539    | 0.140                                                         | 0.02                             |
| Zinc finger protein 638                                                                       | AVIV <u>S</u> SPK                                                                  | 388                                | 2977    | 0.130                                                         | 0.0043                           |
| Nuclear factor 1 C-type                                                                       | <u>S</u> PFN <u>S</u> PS <u>P</u> QDS <u>P</u> R                                   | 735                                | 6381    | 0.120                                                         | 8.80E-05                         |
| Rho GTPase-activating protein 23                                                              | <u>S</u> Y <u>S</u> PS <u>F</u> QR                                                 | 452                                | 3660    | 0.120                                                         | 0.044                            |
| Catenin delta-1                                                                               | <u>S</u> GDLGDM <u>E</u> PLK (7M:Oxidation)                                        | 386                                | 3445    | 0.110                                                         | 1.50E-05                         |
| Arf-GAP domain and FG repeat-containing protein 1                                             | <u>G</u> T <u>P</u> S <u>Q</u> SPV <u>V</u> GR                                     | 2430                               | 22045   | 0.110                                                         | 1.90E-05                         |
| Caveolin-2                                                                                    | ADVQLFMDD <u>S</u> YSH <u>S</u> G <u>L</u> E <u>Y</u> A DPEK (7M:Oxidation)        | 497                                | 4692    | 0.110                                                         | 0.0094                           |
| Zinc finger protein 185                                                                       | GGQGDPAVPAQQPADP <u>S</u> T <u>P</u> ER                                            | 275                                | 2558    | 0.110                                                         | 6.40E-04                         |
| Alpha-actinin-4                                                                               | HEAF <u>E</u> DLAAHQDR                                                             | 176                                | 1785    | 0.100                                                         | 2.30E-05                         |
|                                                                                               | HRPELIE <u>Y</u> DK                                                                | 192                                | 6503    | 0.0300                                                        | 0.0022                           |
| Ribosomal RNA processing protein 1 homolog B                                                  | VAEPGAEAT <u>S</u> STG <u>E</u> ES <u>G</u> SE <u>H</u> PPA VPMHNK (26M:Oxidation) | 250                                | 2986    | 0.0800                                                        | 0.027                            |
| Centromere protein 1                                                                          | GP <u>S</u> PEPLK                                                                  | 237                                | 2815    | 0.0800                                                        | 0.034                            |
| Nucleolar and coiled-body phosphoprotein 1                                                    | VADN <u>S</u> FD <u>A</u> K                                                        | 181                                | 2387    | 0.0800                                                        | 8.20E-05                         |
| Antigen KI-67                                                                                 | <u>S</u> PP <u>P</u> EL <u>T</u> D <u>T</u> A <u>T</u> STK                         | 281                                | 4231    | 0.0700                                                        | 5.60E-05                         |
| Pre-mRNA-splicing regulator WTAP                                                              | EGN <u>T</u> EDDFP <u>S</u> SPGN <u>G</u> NK                                       | 185                                | 2607    | 0.0700                                                        | 0.011                            |
| Disintegrin and metalloproteinase domain-containing protein 12                                | KPP <u>D</u> S <u>Y</u> PPK                                                        | 994                                | 15329   | 0.0600                                                        | 0.011                            |
| SWI/SNF-related matrix-associated actin-dependent regulator of chromatin subfamily A member 5 | <u>T</u> P <u>T</u> S <u>P</u> LK                                                  | 511                                | 8842    | 0.0600                                                        | 2.20E-04                         |
| Putative pre-mRNA-splicing factor ATP-dependent RNA helicase DHX16                            | LLED <u>S</u> EE <u>S</u> SE <u>T</u> V <u>S</u> R                                 | 327                                | 5171    | 0.0600                                                        | 3.80E-04                         |
| Treacle protein                                                                               | QED <u>S</u> ES <u>S</u> EE <u>S</u> DE <u>S</u> EEAA <u>S</u> PA <u>Q</u> V K     | 194                                | 3335    | 0.0600                                                        | 5.10E-05                         |
| Msx2-interacting protein                                                                      | DLEPG <u>E</u> VP <u>S</u> D <u>S</u> DE <u>D</u> GEHK                             | 201                                | 3267    | 0.0600                                                        | 9.00E-04                         |
| Thyroid hormone receptor-associated protein 3                                                 | <u>S</u> PEIHR                                                                     | 1070                               | 23218   | 0.0500                                                        | 0.0097                           |
| BCL2/adenovirus E1B 19 kDa protein-interacting protein 3-like                                 | NGGLEHV <u>P</u> SS <u>S</u> SIHNGDMEK (18M:Oxidation)                             | 258                                | 4966    | 0.0500                                                        | 0.029                            |
| Tight junction protein ZO-1                                                                   | H <u>S</u> PQ <u>Q</u> PS <u>N</u> G <u>S</u> LR                                   | 227                                | 5011    | 0.0500                                                        | 0.033                            |
| Methyl-CpG-binding protein 2                                                                  | A <u>E</u> T <u>S</u> EG <u>S</u> G <u>S</u> APAVPEA <u>S</u> A <u>S</u> PK        | 132                                | 2714    | 0.0500                                                        | 5.60E-04                         |
| Tyrosine-protein kinase BAZ1B                                                                 | LA <u>E</u> DEGD <u>S</u> E <u>P</u> EA <u>V</u> G <u>Q</u> SR                     | 623                                | 14117   | 0.0400                                                        | 9.50E-10                         |
| Sister chromatid cohesion protein PDS5 homolog B                                              | A <u>E</u> SP <u>E</u> SSA <u>I</u> ESTQ <u>S</u> T <u>P</u> QK                    | 586                                | 13727   | 0.0400                                                        | 2.60E-05                         |
| Splicing factor, arginine/serine-rich 19                                                      | <u>S</u> PFLK <u>P</u> DER                                                         | 208                                | 5344    | 0.0400                                                        | 0.017                            |
| Segment polarity protein dishevelled homolog DVL-2                                            | <u>G</u> STGGAP <u>N</u> LR                                                        | 521                                | 15554   | 0.0300                                                        | 0.043                            |
| Serine/arginine-rich splicing factor 11                                                       | D <u>Y</u> DEEE <u>Q</u> G <u>Y</u> D <u>S</u> EK                                  | 251                                | 9316    | 0.0300                                                        | 2.00E-06                         |
| Zinc finger and BTB domain-containing protein 7A                                              | GGAP <u>D</u> PS <u>P</u> GAT <u>A</u> T <u>P</u> GAP <u>A</u> Q <u>P</u> SSP DAR  | 112                                | 4319    | 0.0300                                                        | 4.90E-06                         |
| Protein PML                                                                                   | VV <u>V</u> ISS <u>S</u> ED <u>S</u> DAEN <u>S</u> SSR                             | 108                                | 3326    | 0.0300                                                        | 0.0025                           |
| Histone H3.1t                                                                                 | EIAQDFK                                                                            | 187                                | 8444    | 0.0200                                                        | 0.015                            |

**Supplementary table 3 (5 mM) List of peptides phosphorylated by 5 mM H<sub>2</sub>O<sub>2</sub> incubation for 20 min in hCMEC/D3 cells (continued from page 6 - 13)**

| Description                                                      | Peptide sequence                                         | Average peak intensity (cps)       |         | Peak intensity ratio (H <sub>2</sub> O <sub>2</sub> /control) | Student's <i>t</i> -test p-value |
|------------------------------------------------------------------|----------------------------------------------------------|------------------------------------|---------|---------------------------------------------------------------|----------------------------------|
|                                                                  |                                                          | 5 mM H <sub>2</sub> O <sub>2</sub> | Control |                                                               |                                  |
| Coagulation factor VIII                                          | <u>T</u> SNN <u>S</u> A <u>T</u> NR                      | 491                                | 24347   | 0.0200                                                        | 0.045                            |
| Drebrin                                                          | L <u>S</u> SPVLHR                                        | 209                                | 10013   | 0.0200                                                        | 4.50E-05                         |
| Isthmin-2                                                        | EEEEAPLLPR                                               | 175                                | 7375    | 0.0200                                                        | 0.023                            |
| Pericentriolar material 1 protein                                | V <u>T</u> NDI <u>S</u> PE <u>S</u> SPGVGR               | 62                                 | 3897    | 0.0200                                                        | 6.60E-06                         |
| PHD and RING finger domain-containing protein 1                  | <u>T</u> I <u>S</u> IN <u>S</u> PK                       | 1095                               | 74057   | 0.0100                                                        | 0.0088                           |
| Zinc finger Ran-binding domain-containing protein 2              | <u>Y</u> NLDASE <u>E</u> E <u>E</u> D <u>S</u> NK        | 240                                | 16876   | 0.0100                                                        | 3.30E-08                         |
| Nuclear ubiquitous casein and cyclin-dependent kinases substrate | <u>N</u> SQ <u>E</u> D <u>S</u> E <u>D</u> S <u>E</u> DK | 105                                | 8621    | 0.0100                                                        | 2.10E-04                         |
| Lysosome-associated membrane glycoprotein 1                      | D <u>N</u> T <u>I</u> V <u>T</u> R                       | 106                                | 24667   | 0.0043                                                        | 0.018                            |
| Golgi phosphoprotein 3-like                                      | WVNDPQR                                                  | 10                                 | 5316    | 0.0018                                                        | 0.023                            |
| Pejvakin                                                         | INFDH <u>S</u> LIR                                       | 0                                  | 15385   | 0.0000                                                        | 0.028                            |
| Chromatin assembly factor 1 subunit B                            | G <u>S</u> SPGPRPVEG <u>T</u> PASR                       | 0                                  | 10271   | 0.0000                                                        | 0.0011                           |

hCMEC/D3 cells were treated with 5 mM H<sub>2</sub>O<sub>2</sub> or vehicle (Control) for 20 min, and then whole-cell lysate (1800 µg protein) was digested with lysyl endopeptidase and trypsin. The phosphorylated peptides in the digests were enriched by the HAMMOC method. To increase the sensitivity of LC-MS/MS detection, the phosphorylated peptides were dephosphorylated by incubation with hydrofluoric acid. Finally, dephosphorylated peptides were measured by nanoLC-MS/MS in the shotgun mode (information-dependent acquisition mode) in triplicate experiments. The peak intensities of the precursor ions of the dephosphorylated peptides were comprehensively compared between 5 mM H<sub>2</sub>O<sub>2</sub>- and vehicle-treated conditions using 2D-ICAL software. Among the identified proteins, we focused only on peptides including either S, T or Y in this experiment, because serine (S), threonine (T) and tyrosine (Y) are generally considered potentially phosphorylatable. The average values of peak intensities from the three different measurements were calculated and used to calculate the ratio in the H<sub>2</sub>O<sub>2</sub> and control groups. The identified proteins whose peptide(s) exhibited more than 3-fold differences with statistical significance ( $p < 0.01$ , Student's *t*-test) between two groups were finally selected and are listed here (165 peptides; 147 proteins). In this experiment, it is assumed that the difference in the peak intensities of dephosphorylated peptides detected is consistent with the difference in the phosphorylation levels in the peptides between the two conditions before the dephosphorylation step by hydrofluoric acid (possible phosphorylation sites are indicated with underlines).

**Supplementary table 4 Protein expression and phosphorylation amounts of Cav1 in whole cell lysate of H<sub>2</sub>O<sub>2</sub> treated-hCMEC/D3 cells**

| Protein expression or phosphorylation amounts (fmol/μg protein) |                        |                 |                 |                 |                 |                 |
|-----------------------------------------------------------------|------------------------|-----------------|-----------------|-----------------|-----------------|-----------------|
| H <sub>2</sub> O <sub>2</sub> concentration                     | 0 mM                   | 0.25 mM         | 0.5 mM          | 1 mM            | 2.5 mM          | 5 mM            |
| Total Cav1                                                      | 30.7 ± 4.4             | 31.9 ± 5.3      | 31.6 ± 6.0      | 29.9 ± 4.1      | 29.0 ± 4.1      | 28.9 ± 3.6      |
| Tyr6 phosphorylated Cav1                                        | U.L.Q.<br>(< 0.00654)  | 0.0942 ± 0.0432 | 0.176 ± 0.107   | 0.171 ± 0.047   | 0.164 ± 0.070   | 0.156 ± 0.026   |
| <i>Phosphorylation ratio (%)</i>                                | < 0.0213               | 0.296 ± 0.135   | 0.559 ± 0.340   | 0.573 ± 0.156   | 0.565 ± 0.242   | 0.541 ± 0.091   |
| Tyr14 phosphorylated Cav1                                       | U.L.Q.<br>(< 0.000500) | 1.41 ± 0.31     | 2.87 ± 0.30     | 3.36 ± 0.57     | 4.34 ± 0.74     | 4.79 ± 0.60     |
| <i>Phosphorylation ratio (%)</i>                                | < 0.00163              | 4.44 ± 0.96     | 9.08 ± 0.94     | 11.2 ± 1.9      | 15.0 ± 2.5      | 16.6 ± 2.1      |
| Tyr6 and Tyr14 phosphorylated Cav1                              | U.L.Q.<br>(< 0.00275)  | 0.0145 ± 0.0052 | 0.0437 ± 0.0113 | 0.0473 ± 0.0171 | 0.0482 ± 0.0136 | 0.0434 ± 0.0245 |
| <i>Phosphorylation ratio (%)</i>                                | < 0.00896              | 0.0456 ± 0.0165 | 0.138 ± 0.036   | 0.158 ± 0.057   | 0.166 ± 0.047   | 0.150 ± 0.084   |

Protein expression amount and phosphorylation amounts of Cav1 in whole-cell lysate of hCMEC/D3 cells were determined by LC-MS/MS analysis after enrichment of phosphorylated peptides by the HAMMOC method. hCMEC/D3 cells were incubated with H<sub>2</sub>O<sub>2</sub> in ECF buffer for 20 min. The whole-cell lysate of hCMEC/D3 cells was digested with lysyl endopeptidase and trypsin. The digest (1800 μg protein) was loaded on to a HAMMOC column to enrich phosphorylated peptides. The phosphorylated peptides-enriched fraction was subjected to LC-MS/MS. The phosphorylation levels represents the mean±SD of 9-12 SRM/MRM transitions in three independent analyses. The expression amount of phosphorylated Cav1 was determined by quantification of the peptide YVDSEGHLYTVPIR derived from Cav1. YVDSEGHLYTVPIR peptide contains two phosphorylation sites, so Tyr6-phosphorylated, Tyr14-phosphorylated and both Tyr6/Tyr14-phosphorylated peptides were separately quantified in this study. The phosphorylation ratio (%) were calculated by dividing the expression amount of phosphorylated Cav1 by that of total Cav1. U.L.Q., under the limit of quantification

## Supplementary table 5 Probe peptides and SRM/MRM transitions for LC-MS/MS quantification

| Synonym                                    | Probe Sequence   | Number of AA | Position of                                   |                           | Standard peptide Q1-Q3 (m/z) | Internal standard peptide Q1-Q3 (m/z) |
|--------------------------------------------|------------------|--------------|-----------------------------------------------|---------------------------|------------------------------|---------------------------------------|
|                                            |                  |              | stable isotope-labeled AA from the N terminal | Stable isotope-labeled AA |                              |                                       |
| Caveolin-1 (total)                         | HLNDDVVK         | 9            | 9                                             | K                         | 470.2-251.2                  | 474.3-251.2                           |
|                                            |                  |              |                                               |                           | 470.2-595.2                  | 474.3-595.2                           |
|                                            |                  |              |                                               |                           | 470.2-345.3                  | 474.3-353.3                           |
|                                            |                  |              |                                               |                           | 470.2-246.2                  | 474.3-254.2                           |
| Caveolin-1 (Tyr6 phosphorylated)           | pYVDSEGHLYTVPIR  | 14           | 14                                            | R                         | 576.9-693.9                  | 580.3-698.9                           |
|                                            |                  |              |                                               |                           | 576.9-343.1                  | 580.3-343.1                           |
|                                            |                  |              |                                               |                           | 576.9-748.4                  | 580.3-758.4                           |
|                                            |                  |              |                                               |                           | 576.9-636.3                  | 580.3-641.3                           |
| Caveolin-1 (Tyr14 phosphorylated)          | YVDSEGHLPYTVPIR  | 14           | 14                                            | R                         | 576.9-733.9                  | 580.3-738.9                           |
|                                            |                  |              |                                               |                           | 576.9-385.3                  | 580.3-395.3                           |
|                                            |                  |              |                                               |                           | 576.9-676.3                  | 580.3-681.3                           |
|                                            |                  |              |                                               |                           | 576.9-828.4                  | 580.3-838.4                           |
| Caveolin-1 (Tyr6 and Tyr14 phosphorylated) | pYVDSEGHLPYTVPIR | 14           | 14                                            | R                         | 603.6-733.9                  | 606.9-738.9                           |
|                                            |                  |              |                                               |                           | 904.9-385.3                  | 909.9-395.3                           |
|                                            |                  |              |                                               |                           | 603.6-385.3                  | 606.9-395.3                           |
|                                            |                  |              |                                               |                           | 603.6-676.3                  | 606.9-681.3                           |
| Caveolin-1 (Tyr25 phosphorylated)          | EQGNIPYK         | 7            | 7                                             | K                         | 466.2-390.2                  | 470.2-398.2                           |
|                                            |                  |              |                                               |                           | 466.2-674.3                  | 470.2-682.3                           |
|                                            |                  |              |                                               |                           | 466.2-503.3                  | 470.2-511.3                           |
|                                            |                  |              |                                               |                           | 466.2-258.1                  | 470.2-258.1                           |
| Caveolin-1 (Tyr42 phosphorylated)          | QVpYDAHTK        | 8            | 8                                             | K                         | 347.8-228.6                  | 350.5-232.6                           |
|                                            |                  |              |                                               |                           | 347.8-407.7                  | 350.5-411.7                           |
|                                            |                  |              |                                               |                           | 521.2-248.2                  | 525.2-256.2                           |
|                                            |                  |              |                                               |                           | 521.2-814.3                  | 525.2-822.3                           |
| Src kinase (Tyr419 phosphorylated)         | LIEDNEPYTAR      | 10           | 10                                            | R                         | 652.3-1077.4                 | 657.3-1087.4                          |
|                                            |                  |              |                                               |                           | 652.3-948.4                  | 657.3-958.4                           |
|                                            |                  |              |                                               |                           | 652.3-590.3                  | 657.3-600.3                           |
|                                            |                  |              |                                               |                           | 652.3-833.4                  | 657.3-843.4                           |

Unlabeled (standard, St) and stable isotope ( $^{13}\text{C}$  and  $^{15}\text{N}$ )-labeled peptides (internal standard, IS) were designed by employing the *in silico* peptide selection criteria reported previously (Uchida *et al.*, *Fluids Barriers CNS*. **10** (1), 21, 2013), and synthesized by Thermo Fisher Scientific (Sedanstrasse, Germany) or Scrum Inc. (Tokyo, Japan) with > 95% peptide purity. The concentrations of peptide solutions were determined by quantitative amino acid analysis using a HPLC-UV system with post-column ninhydrin derivatization (LaChrom Elite, Hitachi, Tokyo, Japan). The SRM/MRM transitions were determined from MS/MS spectra obtained by direct infusion of 1  $\mu\text{M}$  peptide solution at a flow rate of 5  $\mu\text{L}/\text{min}$  with a syringe pump (Harvard) into the mass spectrometer. Doubly charged precursor ions were selected (Q1). Four transitions per peptide (Q3-1, -2, -3 and -4), corresponding to high-intensity fragment ions, were

selected. The declustering potentials and collision energies were optimized to maximize signal strength. For the stable isotope-labeled peptides, precursor ions and transitions corresponding to those of the unlabeled peptides were selected, with the same declustering potentials and collision energies as for the unlabeled peptides. pY indicates phosphorylated tyrosine. AA: amino acid.

#### **Reference**

Uchida Y, Tachikawa M, Obuchi W, et al. A study protocol for quantitative targeted absolute proteomics (QTAP) by LC-MS/MS: application for inter-strain differences in protein expression levels of transporters, receptors, claudin-5, and marker proteins at the blood-brain barrier in ddY, FVB, and C57BL/6J mice. *Fluids Barriers CNS* 2013; 10: 21.

### **Supplementary method 1 Uptake assay to estimate P-gp- or MRP1-mediated [<sup>3</sup>H]vinblastine efflux activity**

hCMEC/D3 cells were seeded onto Cultrex<sup>®</sup> Rat Collagen (R&D Systems)-coated 24-well plates at a density of  $5 \times 10^4$  cells/well. Uptake assay was conducted at 6 days after seeding, except for siRNA-transfected cells. The cell surface was washed twice with 500  $\mu$ L of extracellular fluid (ECF) buffer (122 mM NaCl, 25 mM NaHCO<sub>3</sub>, 3 mM KCl, 0.4 mM K<sub>2</sub>HPO<sub>4</sub>, 10 mM d-glucose, 1.4 mM CaCl<sub>2</sub>, 1.2 mM MgSO<sub>4</sub>·7H<sub>2</sub>O, 10 mM HEPES, pH 7.4,  $300 \pm 10$  mOsm) and pre-incubated with 200  $\mu$ L ECF buffer for 30 min at 37°C. To initiate uptake, the pre-incubation buffer was removed and 200  $\mu$ L ECF buffer containing 50 nM [<sup>3</sup>H]vinblastine was added. After incubation for 20 min at 37°C, the cell surface was quickly washed four times with 500  $\mu$ L of ice-cold ECF buffer. When cells were treated with PSC833, MK571, H<sub>2</sub>O<sub>2</sub> or inhibitors (dynasore, imatinib, PP2, SKF-96365, bis-ANS, KRIBB3), we used ECF buffer containing these compounds during both the pre-incubation and uptake procedures. Stock solutions were prepared as follows: PSC833, MK571, dynasore, imatinib, PP2 and KRIBB3 were dissolved in dimethyl sulfoxide, SKF-96365 was dissolved in water, and bis-ANS was dissolved in methanol. During the uptake assay, the final concentration of organic solvent from the stock solution was less than 0.1%. Vehicle controls included the same concentration of the corresponding solvent. NaOH solution (5 mol/L, 200  $\mu$ L) was added to the wells and the plates were incubated at room temperature overnight to lyse the cells. HCl solution (5 mol/L, 200  $\mu$ L) was added for neutralization and the radioactivity in each well was measured by liquid scintillation counting. Protein amount in each well was measured by the Lowry method using DC protein assay reagent (Bio-Rad, Hercules, CA, USA). Cell-to-medium ratio (C/M ratio) ( $\mu$ L/mg protein) was calculated from the vinblastine concentration in the cell (mol/mg protein) divided by that in the incubation buffer (mol/ $\mu$ L). Efflux activity of P-gp was estimated according to Hoshi et al (2017).

### **Reference**

Hoshi Y, Uchida Y, Tachikawa M, et al. Actin filament-associated protein 1 (AFAP-1) is a key mediator in inflammatory signaling-induced rapid attenuation of intrinsic P-gp function in human brain capillary endothelial cells. *J Neurochem* 2017; 141: 247-262.

### **Supplementary method 2 siRNA transfection of hCMEC/D3 cells**

Abl kinase siRNA (sense: 5'-GAAGGGAGGGUGUACCAUUt-3') was synthesized by Nihon Bio-Service (Saitama, Japan). Stealth RNAi<sup>™</sup> siRNA Negative Control Med GC Duplex (Invitrogen, Carlsbad, CA) were used as a negative control for the experiments. siRNA was transfected using Lipofectamine RNAiMAX (Invitrogen). The siRNA treatment of hCMEC/D3 cells was performed according to the manufacturer's instructions. hCMEC/D3 cells were seeded on collagen-coated 24-well plates (for uptake assay) or 10 cm dishes (for LC-MS/MS analysis) at a density of  $2 \times 10^4$  cells/cm<sup>2</sup>. Cells were cultured in the medium without antibiotics for 12 to 18 hours, and then treated with 33 nM siRNA against Abl kinase or 33 nM negative control siRNA using Lipofectamine RNAiMAX and Opti-MEM<sup>®</sup> I Reduced Serum Medium (Invitrogen). The cells were cultured for 72 hours, and used for experiments.

### **Supplementary method 3 Quantitative targeted absolute proteomics (QTAP) in hCMEC/D3 cells, human and rat brain capillaries**

Samples (50  $\mu$ g protein) were suspended in solubilizer (500 mM Tris-HCl (pH 8.5), 7 M guanidium hydrochloride and 10 mM EDTA), and the proteins were S-carbomoylmethylated. The alkylated proteins were precipitated with a mixture of methanol and chloroform. The precipitates were dissolved in 6 M urea in 100 mM Tris-HCl (pH 8.5), and diluted 5-fold with 100 mM Tris-HCl (pH 8.5). The dissolved samples were mixed with ProteaseMAX surfactant (Promega, Madison, WI, USA) and treated with lysyl endopeptidase (LysC; Wako Pure Chemical Industries) at 0.05% final concentration and an enzyme/substrate ratio of 1:100. The mixture was incubated at 30°C for 3 hours, and then treated with TPCK-treated trypsin (Promega) at an enzyme/substrate ratio of 1:100 at 37°C for 16 hours. The tryptic digests were mixed with isotope-labeled peptides as internal standards. The peptide samples were cleaned up for LC-MS/MS analysis by using SDB and GC tip (GL Science, Tokyo, Japan) according to the manufacturer's instructions. Peptide solution acidified with formic acid was centrifuged at 4°C and 17,360 g for 5 min, and the supernatants were subjected to LC-MS/MS analysis.

### **Supplementary method 4 LC-MS/MS conditions for QTAP analysis**

QTAP analysis was performed with an electrospray ionization (ESI) triple quadrupole mass spectrometer (QTRAP5500; Sciex, Framingham, MA) equipped with a Turbo V ion source (Sciex) and coupled with an

Eksigent Expert™ microLC 200 system (Eksigent Technologies, Dublin, CA, USA). Samples equivalent to 10 µg protein were injected onto a HALO C18 column (2.7 µm, 0.5 × 50 mm, Eksigent Technologies) at a flow rate of 10 µL/min, together with isotope-labeled peptides. Mobile phases A and B consisted of 0.1% formic acid in water and 0.1% formic acid in acetonitrile, respectively. The peptides were separated and eluted from the column using the following gradient sequences 1% B (0-2 min), 1-30% B (2-32 min), increased to 30-100% B (32-35 min), maintained at 100% B (35-37 min), reduced to 100-1% B (37-39 min) and then maintained at 1% B (39-55 min). The eluted peptides were simultaneously and selectively detected by means of electro-spray ionization in a multiplexed selected/multiple reaction monitoring (SRM/MRM) mode. The source/gas parameters were as follows: ion source gas 1 (20 psi), ion source gas 2 (40 psi), curtain gas (40 psi), collision gas (12 psi), ion spray voltage floating (5500 V), interface heater temperature (500°C). The dwell time was 10 msec per SRM/MRM transition. Each molecule was monitored with four sets of SRM/MRM transitions (Q1/Q3-1, Q1/Q3-2, Q1/Q3-3, Q1/Q3-4) derived from one set of unlabeled (standard) and isotope-labeled (internal standard) peptides. Non-phosphorylated peptides of caveolin-1 and phosphorylated peptides of caveolin-1 and Src kinase (pTyr6, pTyr14, both pTyr6 and pTyr14, pTyr25 and pTyr42 caveolin-1 and pTyr419 Src kinase) were monitored using the peptides and SRM/MRM transitions listed in Supplementary Table 1, and P-gp and MRP1 were monitored using those reported by Uchida et al. (2011). Chromatogram ion counts were determined by using an auto analysis system established in our laboratory [Uchida et al., 2013]. Signal peaks with a peak area count of over 5000 detected at the same retention time as an isotope-labeled peptide were defined as positive. When positive peaks were observed in three or four sets of SRM/MRM transitions, the molecules were considered to be expressed, and the protein expression amounts were determined as the average of the three or four quantitative values. The limit of quantification was calculated as described previously [Uchida et al. 2011].

## References

Uchida Y, Ohtsuki S, Katsukura Y, et al. Quantitative targeted absolute proteomics of human blood-brain barrier transporters and receptors. *J Neurochem* 2011; 117: 333-345.

Uchida Y, Tachikawa M, Obuchi W, et al. A study protocol for quantitative targeted absolute proteomics (QTAP) by LC-MS/MS: application for inter-strain differences in protein expression levels of transporters, receptors, claudin-5, and marker proteins at the blood-brain barrier in ddY, FVB, and C57BL/6J mice. *Fluids Barriers CNS* 2013; 10: 21.

## Supplementary method 5 LC-MS/MS conditions for phosphoproteomic analysis

Phosphoproteomic analysis was performed with an electrospray ionization (ESI) triple TOF 5600 mass spectrometer (Sciex) equipped with a NanoSpray III ion source (Sciex) and coupled with a nanoLC ultra 2D plus (Eksigent Technologies). The NanoLC is connected to a cHiPLC® nanoflex (Eksigent Technologies) with a column-switching system that can handle two sets of gradient pumps and analytical columns. The peptide solution (1 µg protein) was loaded onto one analytical column (75 µm x 15 cm, ReproSil-Pur 3 µm, C18-AQ 120A<sup>o</sup>) and eluted at a flow rate of 300 nL/min. During analysis using one column, the next peptide solution was preliminarily loaded onto the other analytical column at a flow rate 300 nL/min. Mobile phases A and B consisted of 0.1% formic acid in water and 0.1% formic acid in acetonitrile, respectively. The LC-gradient design was as follows: for sample analysis: 0-50% B (0-140 min), increased to 50-100% B (140-141 min), maintained at 100% B (141-150 min), reduced to 0% B (150-150.1 min), and then maintained at 0% B (150.1-160 min), for sample loading: 0% B (0-160 min). The column temperature was not set (room temperature). The eluted peptides were sprayed through a PicoTip™ nanospray emitter (New Objective, Woburn, MA). The source/gas parameters were as follows: ion source gas 1 (20 psi), ion source gas 2 (0 psi), curtain gas (20 psi), ion spray voltage floating (2300 V), interface heater temperature (150°C). The scan parameters were as follows: TOF MS scan (350-1250 Da), TOF MS accumulation time (0.25 sec), MS/MS scan (100-1600 Da), MS/MS accumulation time (0.1 sec), declustering potential (80 V), collision energy (35 V), collision energy spread (15 V). After TOF MS survey scan, a maximum of 20 intense precursor ions per cycle were selected and fragmented within the 1.3 sec cycle time. Data analysis for peak alignment between different measurements and the calculation of peak intensities were conducted using the two-dimensional image-converted analysis of liquid chromatography-mass spectrometry (2D-ICAL) software package (Mitsui Knowledge Industry Co. Ltd, Tokyo, Japan) with the analytical settings described by Nurdin et al. (2016). Candidate phosphoproteins were determined as described previously [Hoshi et al., 2017]. Identified peptides that exhibited more than 3-fold difference

with statistical significance ( $p < 0.01$ , Student's t-test) between the two groups were finally selected and are listed in Supplementary table 2 and 3.

## References

Nurdin A, Hoshi Y, Yoneyama T, et al. Global and Targeted Proteomics of Prostate Cancer Cell Secretome: Combination of 2-dimensional image-converted analysis of liquid chromatography and mass spectrometry and in silico selection selected reaction monitoring analysis. *J Pharm Sci* 2016; 105: 3440-3452.

Hoshi Y, Uchida Y, Tachikawa M, et al. Actin filament-associated protein 1 (AFAP-1) is a key mediator in inflammatory signaling-induced rapid attenuation of intrinsic P-gp function in human brain capillary endothelial cells. *J Neurochem* 2017; 141: 247-262.

## Supplementary method 6 *In situ* brain perfusion

Rats were anaesthetized with a mixture of ketamine hydrochloride (125 mg/kg body weight) and xylazine hydrochloride (1.22 mg/kg body weight), and kept warm on a hot plate. The external carotid arteries were exposed on the left side by midline incision at the neck, and cannulated using polyethylene tubing (SP-10; Natume, Tokyo, Japan) to allow perfusion of modified Ringer's solution (128 mM NaCl, 4.2 mM KCl, 2.4 mM  $\text{KH}_2\text{PO}_4$ , 24 mM  $\text{NaHCO}_3$ , 0.9 mM  $\text{MgCl}_2 \cdot 6\text{H}_2\text{O}$ , 1.5 mM  $\text{CaCl}_2$ , 9 mM D-glucose, 3.9% w/v 100 kDa dextran, 0.1% w/v BSA, pH 7.4) as described by Hosoya et al. (2001). Rats received 30 min constant infusion of DMSO (vehicle), 328  $\mu\text{M}$  imatinib, or 328  $\mu\text{M}$  PP2 dissolved in modified Ringer's solution at 50  $\mu\text{L}/\text{min}$  for 30 min (Harvard pump 11; Harvard Apparatus Inc., MA). All vehicle controls were infused with the same concentrations of DMSO as used in the test conditions. During the infusion, the final concentrations of imatinib and PP2 at the vessel lumen of the BBB were close to 5  $\mu\text{M}$ , because the blood flow rate at the internal carotid artery was estimated to be 840  $\mu\text{L}/\text{min}$  [Pardridge et al., 1985]. After pre-infusion, a solution of 1  $\mu\text{M}$  quinidine or 1  $\mu\text{M}$  cortisol with 500  $\mu\text{M}$  raffinose and 5 mM hydrogen peroxide dissolved in modified Ringer's solution (37 °C) was perfused at 2 ml/min for 10 min. For imatinib- or PP2-treated rats, 275 nM imatinib or 275 nM PP2 was simultaneously perfused. This concentration was estimated to be the same as the free concentration of 5  $\mu\text{M}$  imatinib in plasma, because the free fraction of imatinib in rat plasma is reported to be 5.5% [Kretz et al., 2004]. At the end of the perfusion, rats were sacrificed, and cerebrum, hippocampus, and hypothalamus of the left hemisphere were collected and weighed. Tissues were homogenized in 10 mM ammonium acetate (4 mL : 1 g tissue) and then 300  $\mu\text{L}$  (whole cerebrum), 120  $\mu\text{L}$  (hippocampus) or 60  $\mu\text{L}$  (hypothalamus) of homogenate and 1200  $\mu\text{L}$  of acetonitrile containing 1% formic acid and internal standard (1  $\mu\text{M}$  cinchonine for quinidine; 500  $\mu\text{M}$  sucrose for raffinose; 1  $\mu\text{M}$  dexamethasone for cortisol) were mixed and shaken for 20 min. The homogenates were centrifuged at 4°C and 17,360 g for 5 min. The supernatant was collected and evaporated by centrifugation under vacuum, and the residue was reconstituted in 100  $\mu\text{L}$  of 0.1% aqueous formic acid. This solution was centrifuged at 4°C and 17,360 g for 5 min and the supernatant was subjected to LC-MS/MS analysis. Perfusate solutions were diluted 10-fold with 0.1% formic acid in water and mixed with internal standards. Aliquots were used for LC-MS/MS analysis.

The LC-MS/MS analyses for the quantification of low-molecular-weight molecules were performed with a QTRAP5500 coupled with an UPLC system (Waters, Milford, MA). For quinidine and cortisol, AQCURITY UPLC BEH C18 (2.1 × 50 mm, 1.7  $\mu\text{m}$  particles; Waters) at a flow rate of 500  $\mu\text{L}/\text{min}$  was used. Mobile phases A and B consisted of 0.1% formic acid in water and 0.1% formic acid in acetonitrile, respectively. The gradient sequences were 1% B (0-1 min), increased to 1-100% B (1-3 min), maintained at 100% B (3-4 min), reduced to 100-1% B (4-4.1 min) and then maintained at 1% B (4.1-6 min). The source/gas parameters were as follows: ion source gas 1 (50 psi for quinidine; 60 psi for cortisol), ion source gas 2 (50 psi for quinidine; 40 psi for cortisol), curtain gas (15 psi for quinidine; 20 psi for cortisol), collision gas (6 psi for quinidine; 12 psi for cortisol), ion spray voltage floating (5500 V for quinidine and cortisol), interface heater temperature (600°C for quinidine and cortisol). Quinidine, cinchonine, cortisol and dexamethasone were positively ionized and monitored at 325.3/160.3, 295.3/130.1, 363.3/121.0 and 393.1/373.3, respectively. For raffinose, ZIC®-pHILIC (2.1 × 100 mm, 5  $\mu\text{m}$  particles; Millipore) at a flow rate of 250  $\mu\text{L}/\text{min}$  was connected to the UPLC system. Mobile phases A and B consisted of 0.1% formic acid in water and 0.1% formic acid in acetonitrile, respectively. The gradient sequences were 98% B (0 min), reduced to 98-30% B (0-6 min), maintained at 30% B (6-7.6 min), increased to 30-98% B (7.6-7.7 min) and then maintained at 98% B (7.7-10 min). The source/gas parameters were as follows: ion source gas 1 (60 psi), ion source gas 2 (60 psi), curtain gas (30 psi), collision gas (10 psi), ion spray voltage floating (-4500 V), interface heater temperature (550°C). Raffinose and sucrose were negatively ionized



and monitored with 503.2/179.1 and 341.1/88.8, respectively. The brain-to-perfusate concentration ratio ( $R_{br}$ ,  $\mu\text{L/g tissue}$ ) was calculated individually for each rat by dividing the tissue concentration ( $\text{mol/g tissue}$ ) by the perfusate concentration ( $\text{mol}/\mu\text{L}$ ).

### References

Hosoya K, Saeki S, Terasaki T. Activation of carrier-mediated transport of L-cystine at the blood-brain and blood-retinal barriers in vivo. *Microvasc Res* 2001; 62: 136-142.

Pardridge WM, Fierer G. Blood-brain barrier transport of butanol and water relative to N-isopropyl-p-iodoamphetamine as the internal reference. *J Cereb Blood Flow Metab* 1985; 5: 275-281.

Kretz O, Weiss HM, Schumacher MM, et al. In vitro blood distribution and plasma protein binding of the tyrosine kinase inhibitor imatinib and its active metabolite, CGP74588, in rat, mouse, dog, monkey, healthy humans and patients with acute lymphatic leukaemia. *Br J Clin Pharmacol* 2004; 58: 212-216.
